# Supplementary material
Source: publisher figshare collection journal article supplement (https://gsajournals.figshare.com/ndownloader/files/28112799)
Supplement: Supplementary file 1 [file 28112799]

## Sheet: TableS1
Table S1: Whole-genome bisulfite sequence mapping statistics
ID	Sample	Reference	Read Number	Total paired aligned	single	% Mapped	Conversion Rate
BN4	B73 rep1	B73v4	300486928	178021507	25335060	0.592443	99.4426
BN5	B73 rep 2	B73v4	350481634	208208122	28551115	0.594063	99.4452
MN4	Mo17 rep 1	Mo17	292007848	179344346	24884501	0.614176	99.6838
MN5	Mo17 rep 2	Mo17	314362827	190423990	26428480	0.605746	99.6736
ON4	Oh43 rep 1	Oh43	307821313	182376885	24609037	0.592476	99.1924
ON5	Oh43 rep 2	Oh43	361663168	207190640	30351407	0.572883	99.2545
WN4	W22 rep 1	W22	297457705	182386478	25971081	0.613151	99.5322
WN5	W22 rep 2	W22	296944325	174763852	28906243	0.588541	99.5391
MN4	Mo17 rep 1	B73v4	292007848	128166520	31441058	0.438915	ND
MN5	Mo17 rep 2	B73v4	314362827	135492111	33028873	0.431006	ND
ON4	Oh43 rep 1	B73v4	307821313	133522189	32404591	0.433765	ND
ON5	Oh43 rep 2	B73v4	361663168	151595793	37947708	0.419163	ND
WN4	W22 rep 1	B73v4	297457705	128861298	29791109	0.433209	ND
WN5	W22 rep 2	B73v4	296944325	123719969	31243067	0.416644	ND
*Conversion Rate was not determined (ND) for mapping non-B73 genotypes to the B73 reference genome

## Sheet: TableS2
Table S2: ATAC-seq mapping statistics
ID	Sample	Reference	Number of Raw Reads	Alignment Rate (%)	# of ACRs	% overlap with corresponding UMR file
BN1A	B73 control rep 1 ATAC	B73v4	321930872	54.0749	26547	0.923532
BN2A	B73 control rep 2 ATAC	B73v4	287405084	53.8269	27052	0.929247
MN1A	Mo17 control rep 1 ATAC	Mo17	380568444	54.0772	25764	0.943254
MN2A	Mo17 control rep 2 ATAC	Mo17	428946468	60.2323	29371	0.949236
ON1A	Oh43 control rep 1 ATAC	Oh43	295923148	47.4319	22440	0.925401
ON2A	Oh43 control rep 2 ATAC	Oh43	293827860	49.5066	20485	0.92785
WN1A	W22 control rep 1 ATAC	W22	474276588	51.1814	24564	0.928554
WN2A	W22 control rep 2 ATAC	W22	720210844	51.5936	21907	0.924545
MN1A	Mo17 control rep 1 ATAC	B73v4	380568444	37.4585	25945	0.899672
MN2A	Mo17 control rep 2 ATAC	B73v4	428946468	40.0311	28185	0.89537
ON1A	Oh43 control rep 1 ATAC	B73v4	295923148	33.8552	26269	0.88397
ON2A	Oh43 control rep 2 ATAC	B73v4	293827860	34.526	24044	0.88022
WN1A	W22 control rep 1 ATAC	B73v4	474276588	34.867	23889	0.881452
WN2A	W22 control rep 2 ATAC	B73v4	720210844	34.667	22616	0.868544

## Sheet: TableS3
Table S3: Correlation between replicates
	Correlation between replicates	% of rep1 ACRs in merged set	% of rep2 ACRs in merged set
B73 - ATACseq	0.96528	0.85	0.82
Mo17 - ATACseq	0.970656	0.92	0.87
W22 - ATACseq	0.966245	0.83	0.91
Oh43 - ATACseq	0.956898	0.91	0.86
B73 - WGBS	0.961811	0.961	0.978

## Sheet: TableS4
Table S4: IBS regions between B73 and Mo17 or W22
B73 coordinates	Mb size	IBD genotype	% of bins Shared	# B73 UMRs	# Variable mC
2:124400000-129750000	5.35	Mo17	0.9955	70	0 (0%)
2:184400000-190350000	5.95	Mo17	0.9486	359	8 (2.2%)
8:148050000-155450000	7.4	Mo17	0.9617	546	9 (1.6%)
5:118050000-123550000	5.5	Mo17	0.963	105	7 (6.7%)
2:122450000-129750000	7.3	W22	0.9867	105	2 (1.9%)
3:67800000-85500000	17.7	W22	0.9699	264	7 (2.7%)
7:28450000-41350000	12.9	W22	0.9634	448	15 (3.3%)
1:126100000-135950000	9.85	W22	0.9467	124	3 (2.4%)
3:102650000-111700000	9.05	W22	0.9811	250	3 (1.2%)
6:44900000-51850000	6.95	W22	0.9809	129	7 (5.4%)
6:52550000-60900000	8.35	W22	0.9644	189	8 (4.2%)
8:123400000-139800000	16.4	W22	0.9589	849	21 (2.5%)
